# Supplementary material for: Twenty-Year Change in Severity and Outcome of Ischemic and Hemorrhagic Strokes
Source: PubMed Central journal article supplement (PMC8649912; doi:10.1001/jamaneurol.2021.4346), 2021-12-06
Supplement: jamaneurol-e214346-s002.pdf [file jamaneurol-e214346-s002.pdf]

\*Indicates required information. Only first name, last name, and suffix will appear in PubMed.

| <b>*Group Name(s): Japan Stroke Data Bank Investigators</b> |                   |                              |                  |                                             |                                          |                                                         |                                                                                            |
|-------------------------------------------------------------|-------------------|------------------------------|------------------|---------------------------------------------|------------------------------------------|---------------------------------------------------------|--------------------------------------------------------------------------------------------|
| <b>*First Name and Middle Initial(s)</b>                    | <b>*Last Name</b> | <b>*Suffix (eg, Jr, III)</b> | Academic Degrees | Institution                                 | Location (city, state/province, country) | Role or Contribution, eg, chair, principal investigator | Group (if more than 1 Group listed in the byline) and/or Subgroup (eg, Steering Committee) |
| Koji                                                        | Iihara            |                              | MD, PhD          | National Cerebral and Cardiovascular Center | Suita, Osaka, Japan                      | Steering Committee member                               |                                                                                            |
| Ryo                                                         | Itabashi          |                              | MD, PhD          | Iwate Medical University                    | Yahaba, Iwate, Japan                     | Steering Committee member                               |                                                                                            |
| Takanari                                                    | Kitazono          |                              | MD, PhD          | Kyushu University                           | Fukuoka, Japan                           | Steering Committee member                               |                                                                                            |
| Kuniaki                                                     | Ogasawara         |                              | MD, PhD          | Iwate Medical University                    | Yahaba, Iwate, Japan                     | Steering Committee member                               |                                                                                            |
| Shigeru                                                     | Nogawa            |                              | MD, PhD          | Tokai University Hachioji Hospital          | Hachioji, Tokyo, Japan                   | Steering Committee member                               |                                                                                            |
| Masaaki                                                     | Uno               |                              | MD, PhD          | Kawasaki Medical School                     | Kurashiki, Okayama, Japan                | Steering Committee member                               |                                                                                            |
| Fusao                                                       | Ikawa             |                              | MD, PhD          | Shimane Prefectural Central Hospital        | Izumo, Shimane, Japan                    | Steering Committee member                               |                                                                                            |
| Shuhei                                                      | Yamaguchi         |                              | MD, PhD          | Shimane Prefectural Central Hospital        | Izumo, Shimane, Japan                    | Steering Committee member                               |                                                                                            |
| Ai                                                          | Ito               |                              | -                | National Cerebral and Cardiovascular Center | Suita, Osaka, Japan                      | Secretary                                               |                                                                                            |
